# Supplementary material
Source: Springer Nature journal article supplement (https://www.springermedizin.de/resource/supplementary/12880_2013_241_MOESM14_ESM.pdf/9450300)

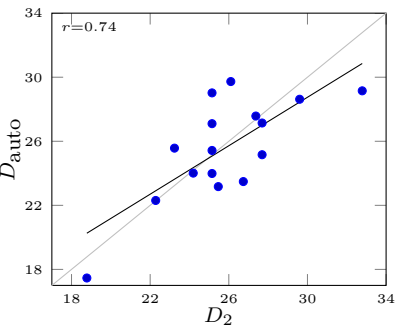

Supplement: MOESM14 [file 9450300]
